# Supplementary material
Source: PubMed Central journal article supplement (PMC7567335)
Supplement: NIHMS1624844-supplement-1.pdf [file NIHMS1624844-supplement-1.pdf]

938  
939  
940  
941  
942  
943  
944  
945  
946  
947  
948  
949

## Supporting Information

### Materials

Resins of Urethane Methacrylate (UMA, in cyan, white and black) and Silicone (SIL 30 in grey) were generously supplied by Carbon, Inc. (Redwood, CA.). Isopropanol (IPA) from Thermo Fisher Scientific (Waltham, MA USA) was used as received. Placebo Estring<sup>®</sup> and NuvaRing<sup>®</sup> were obtained from Particle Sciences Inc. and stored in ambient conditions prior to mechanical testing.

Silicone: Placebo EstRing<sup>®</sup>

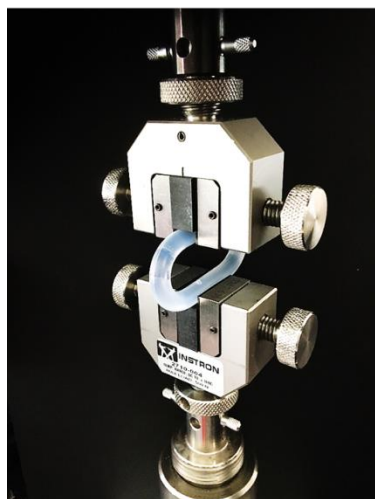

SIL 30: 54 – 7.6 Solid

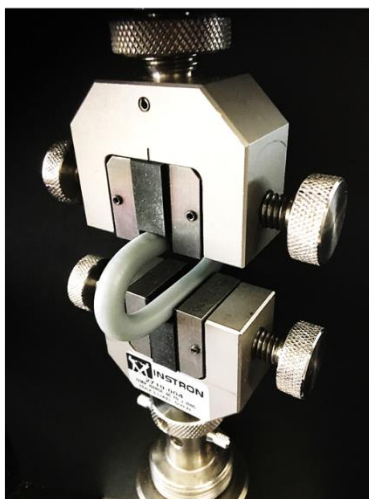

SIL 30: Nodal 3.80 [Unbanded]

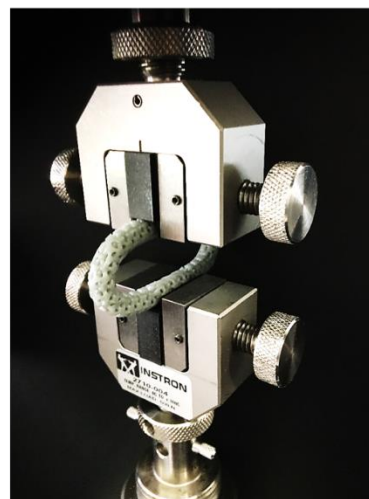

950  
951  
952  
953  
954

**Supporting Figure 1. Mechanical property testing with Instron for load at 50% compression.** Representative rings shown (left to right) silicone EstRing placebo, DLS SIL 30: 54-7.6 solid ring, and DLS SIL 30: Nodal 3.80 (unbanded). Custom UMA shims designed to support and stabilize ring during compression.

955

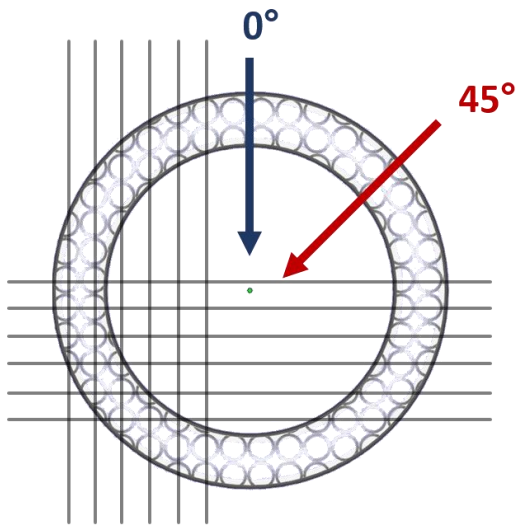

956

957 **Supporting Figure 2. Schematic illustration force orientation relative to unit cell array.**

958 Example CAD image of Cylinder 3.80 banded (4.0H 0.6T) with lines demonstrating direction of

959 linear array of unit cell. Force orientation was conducted at both 0° and 45°, relative to the array

960 of the unit cell.

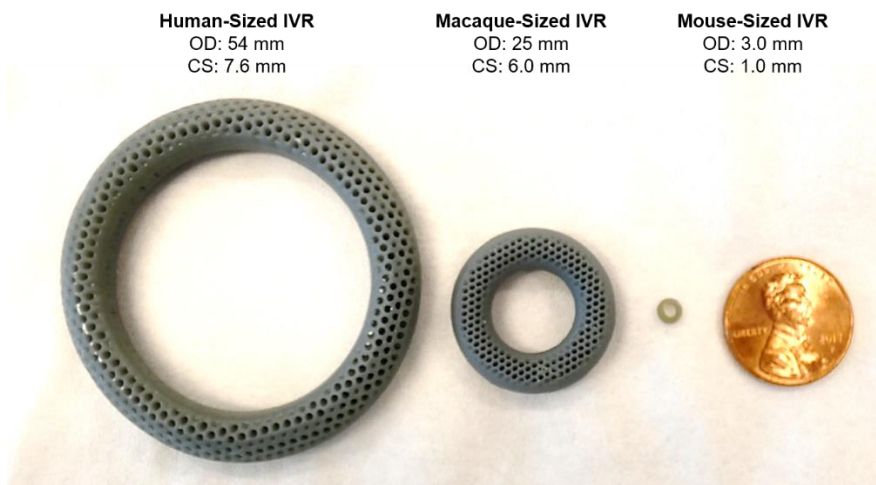

961

962 **Supporting Figure 3. Images of IVRs by size fabricated by DLS in SIL 30. Human, macaque**

963 and mouse-sized IVRs compared to a standard penny.

964

965

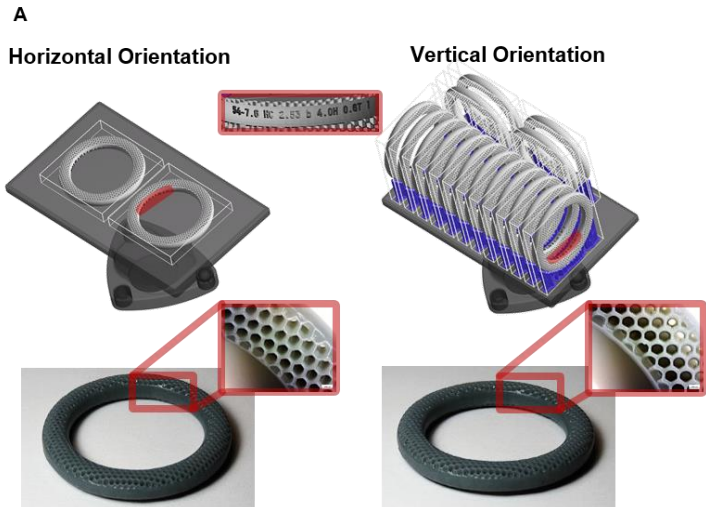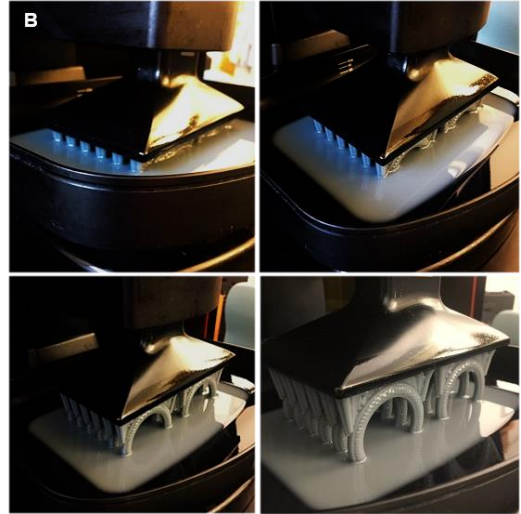

**Supporting Figure 4. Illustration of horizontal versus vertical orientation.** Demonstration of multiple rings orientated horizontally and vertically with identifying label. Multiple rings (x16) during the fabrication process with DLS in SIL 30.

970

971

972

973

974

975

976

977

978

979 **Supporting Table 1. Tabulation of volume fraction and log 50% compression of IVRs**  
 980 **presented in Figure 7. Average and standard deviation values represent n=3 samples per ring**  
 981 **type.**

| Outer Diameter - Cross Section (mm) | IVR Design Parameters |                     |                  |                     | Volume Fraction |       | Log 50% Compression |        |
|-------------------------------------|-----------------------|---------------------|------------------|---------------------|-----------------|-------|---------------------|--------|
|                                     | Unit Cell Design      | Unit Cell Size (mm) | Band Height (mm) | Band Thickness (mm) | Average         | Stdev | Average             | Stdev  |
| <b>Silicon: Estring</b>             | Solid                 | ---                 | ---              | ---                 | 1.000           | 2.027 | 0.307               | -0.872 |
| <b>EVA: NuvaRing</b>                | Solid                 | ---                 | ---              | ---                 | 1.000           | 2.611 | 0.417               | -0.766 |
| <b>DLS 54-7.6</b>                   | Solid                 | ---                 | ---              | ---                 | 1.000           | 0.003 | 0.307               | -0.872 |
| <b>DLS 54-4.0</b>                   | Solid                 | ---                 | ---              | ---                 | 1.000           | 0.134 | -0.873              | -2.180 |
| <b>DLS 54-7.6</b>                   | Nodal                 | 3.80                | ---              | ---                 | 0.543           | 0.006 | -0.430              | -1.330 |
| <b>DLS 54-7.6</b>                   | Nodal                 | 3.80                | 4.0              | 0.6                 | 0.681           | 0.013 | -0.155              | -1.433 |
| <b>DLS 54-7.6</b>                   | Nodal                 | 1.52                | ---              | ---                 | 0.871           | 0.004 | 0.143               | -1.669 |
| <b>DLS 54-7.6</b>                   | Nodal                 | 1.52                | 4.0              | 0.6                 | 0.979           | 0.001 | 0.183               | -1.302 |
| <b>DLS 54-7.6</b>                   | Cylinder              | 3.80                | ---              | ---                 | 0.389           | 0.001 | -0.869              | -1.431 |
| <b>DLS 54-7.6</b>                   | Cylinder              | 3.80                | 4.0              | 0.3                 | 0.535           | 0.006 | -0.345              | -1.681 |
| <b>DLS 54-7.6</b>                   | Cylinder              | 3.80                | 4.0              | 0.6                 | 0.557           | 0.023 | -0.155              | -1.479 |
| <b>DLS 54-7.6</b>                   | Cylinder              | 3.80                | 4.0              | 0.9                 | 0.544           | 0.005 | -0.046              | -1.812 |
| <b>DLS 54-7.6</b>                   | Cylinder              | 3.80                | 4.0              | 1.2                 | 0.629           | 0.025 | 0.040               | -1.577 |
| <b>DLS 54-7.6</b>                   | Cylinder              | 2.53                | ---              | ---                 | 0.429           | 0.004 | -0.762              | -1.833 |
| <b>DLS 54-7.6</b>                   | Cylinder              | 2.53                | 4.0              | 0.6                 | 0.629           | 0.019 | -0.145              | -1.675 |
| <b>DLS 54-7.6</b>                   | Cylinder              | 1.90                | ---              | ---                 | 0.538           | 0.004 | -0.678              | -1.614 |
| <b>DLS 54-7.6</b>                   | Cylinder              | 1.90                | 4.0              | 0.6                 | 0.715           | 0.005 | -0.148              | -1.820 |
| <b>DLS 54-7.6</b>                   | Honeycomb             | 3.80                | ---              | ---                 | 0.302           | 0.003 | -0.148              | -1.752 |
| <b>DLS 54-7.6</b>                   | Honeycomb             | 3.80                | 4.0              | 0.6                 | 0.499           | 0.008 | -0.159              | -1.733 |
| <b>DLS 54-7.6</b>                   | Honeycomb             | 3.12                | 4.0              | 0.6                 | 0.650           | 0.011 | -0.137              | -1.553 |
| <b>DLS 54-7.6</b>                   | Honeycomb             | 2.53                | ---              | ---                 | 0.370           | 0.005 | -0.681              | -1.682 |
| <b>DLS 54-7.6</b>                   | Honeycomb             | 2.53                | 3.0              | 0.6                 | 0.554           | 0.006 | -0.214              | -1.455 |
| <b>DLS 54-7.6</b>                   | Honeycomb             | 2.53                | 4.0              | 0.6                 | 0.573           | 0.018 | -0.108              | -1.397 |
| <b>DLS 54-7.6</b>                   | Honeycomb             | 2.53                | 5.0              | 0.6                 | 0.600           | 0.005 | -0.074              | -1.462 |
| <b>DLS 54-7.6</b>                   | Honeycomb             | 2.53                | 6.0              | 0.6                 | 0.686           | 0.006 | -0.011              | -1.481 |
| <b>DLS 54-7.6</b>                   | Honeycomb             | 1.90                | ---              | ---                 | 0.601           | 0.021 | -0.640              | -1.739 |
| <b>DLS 54-7.6</b>                   | Honeycomb             | 1.90                | 4.0              | 0.6                 | 0.688           | 0.014 | -0.146              | -1.405 |
| <b>DLS 54-7.6</b>                   | Dode                  | 3.63                | ---              | ---                 | 0.385           | 0.003 | -0.765              | -1.653 |
| <b>DLS 54-7.6</b>                   | Dode                  | 3.63                | 4.0              | 0.6                 | 0.579           | 0.000 | -0.150              | -1.768 |
| <b>DLS 54-7.6</b>                   | Dode                  | 3.80                | ---              | ---                 | 0.331           | 0.003 | -0.778              | -1.500 |
| <b>DLS 54-7.6</b>                   | Dode                  | 3.80                | 4.0              | 0.6                 | 0.578           | 0.007 | -0.143              | -1.431 |

982

983
